# Supplementary material for: Design and Immunological Evaluation of a Hybrid Peptide as a Potent TLR2 Agonist by Structure-Based Virtual Screening
Source: PubMed Central journal article supplement (PMC7905067; doi:10.3389/fcell.2021.620370), 2021-02-11
Supplement: Image_1.pdf [file Image_1.pdf]

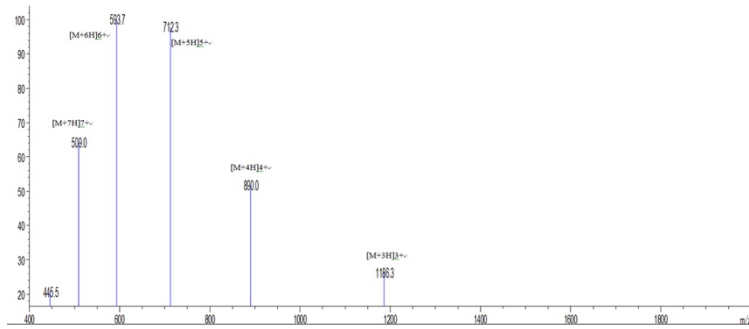

**Figure S1.** Mass spectrometry analysis of purity peptides.
